# Supplementary material for: Keap-NRF2 signaling contributes to the Notch1 protected heart against ischemic reperfusion injury via regulating mitochondrial ROS generation and bioenergetics
Source: PubMed Central journal article supplement (PMC8898363; doi:10.7150/ijbs.63297), 2022-02-07
Supplement: ijbsv18p1651s1.pdf [file ijbsv18p1651s1.pdf]

A

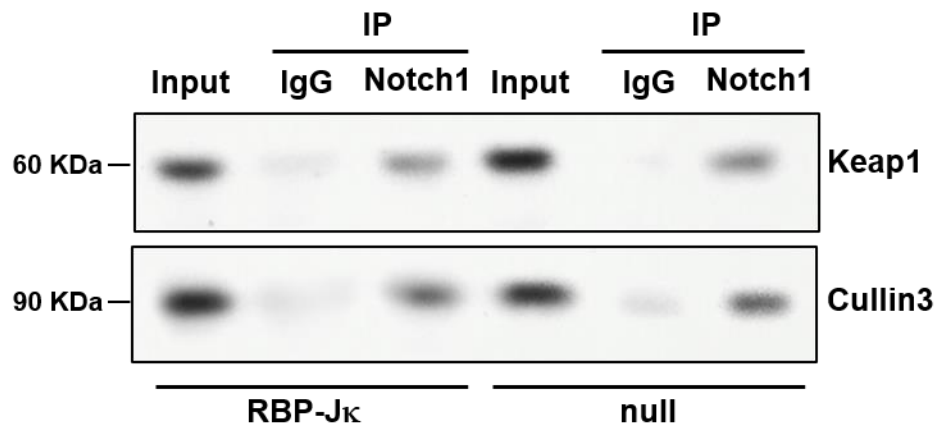

B

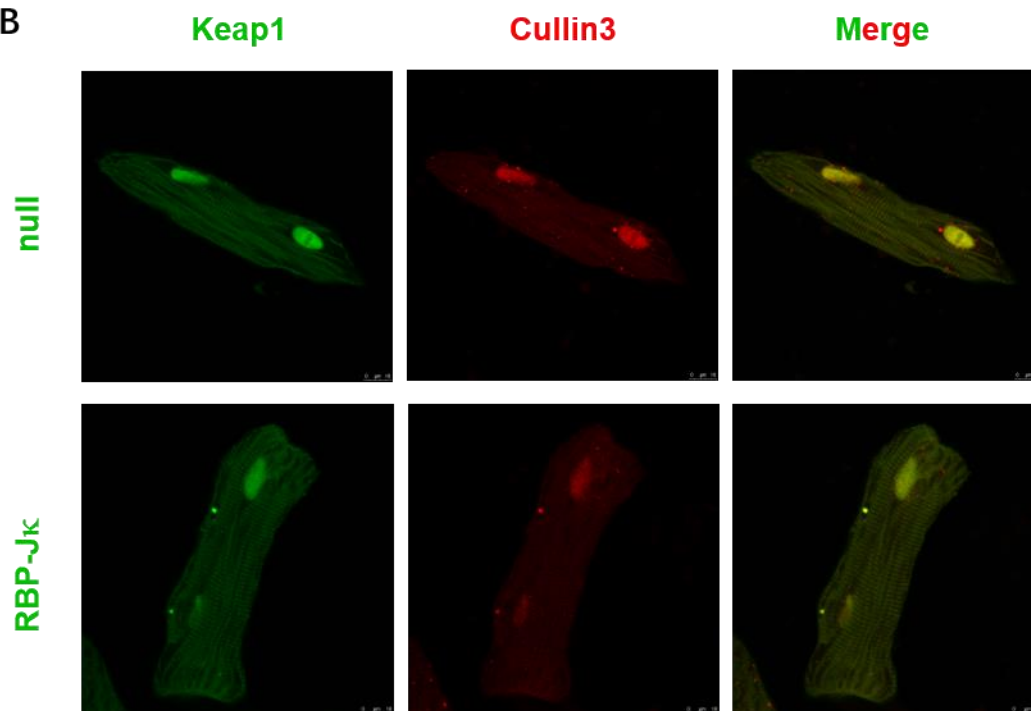

**Supplementary Figure 1. RBP-J $\kappa$  do not affect the Keap1-Cullin3 interaction in adult cardiomyocytes.** (A) Co-immunoprecipitation assay was used to analysis the interaction between Notch1, Keap1 and Cullin3. (B) Immunofluorescence observation of the distribution of Keap1 and Cullin3 by confocal microscopy. N=3.
